# Supplementary material
Source: publisher figshare collection journal article supplement (https://karger.figshare.com/ndownloader/files/29645832)
Supplement: Supplementary file 1 [file 29645832]

**Online Supplementary Material**

Title: Natural course and prognostic factors of immediate-type peanut allergy in children


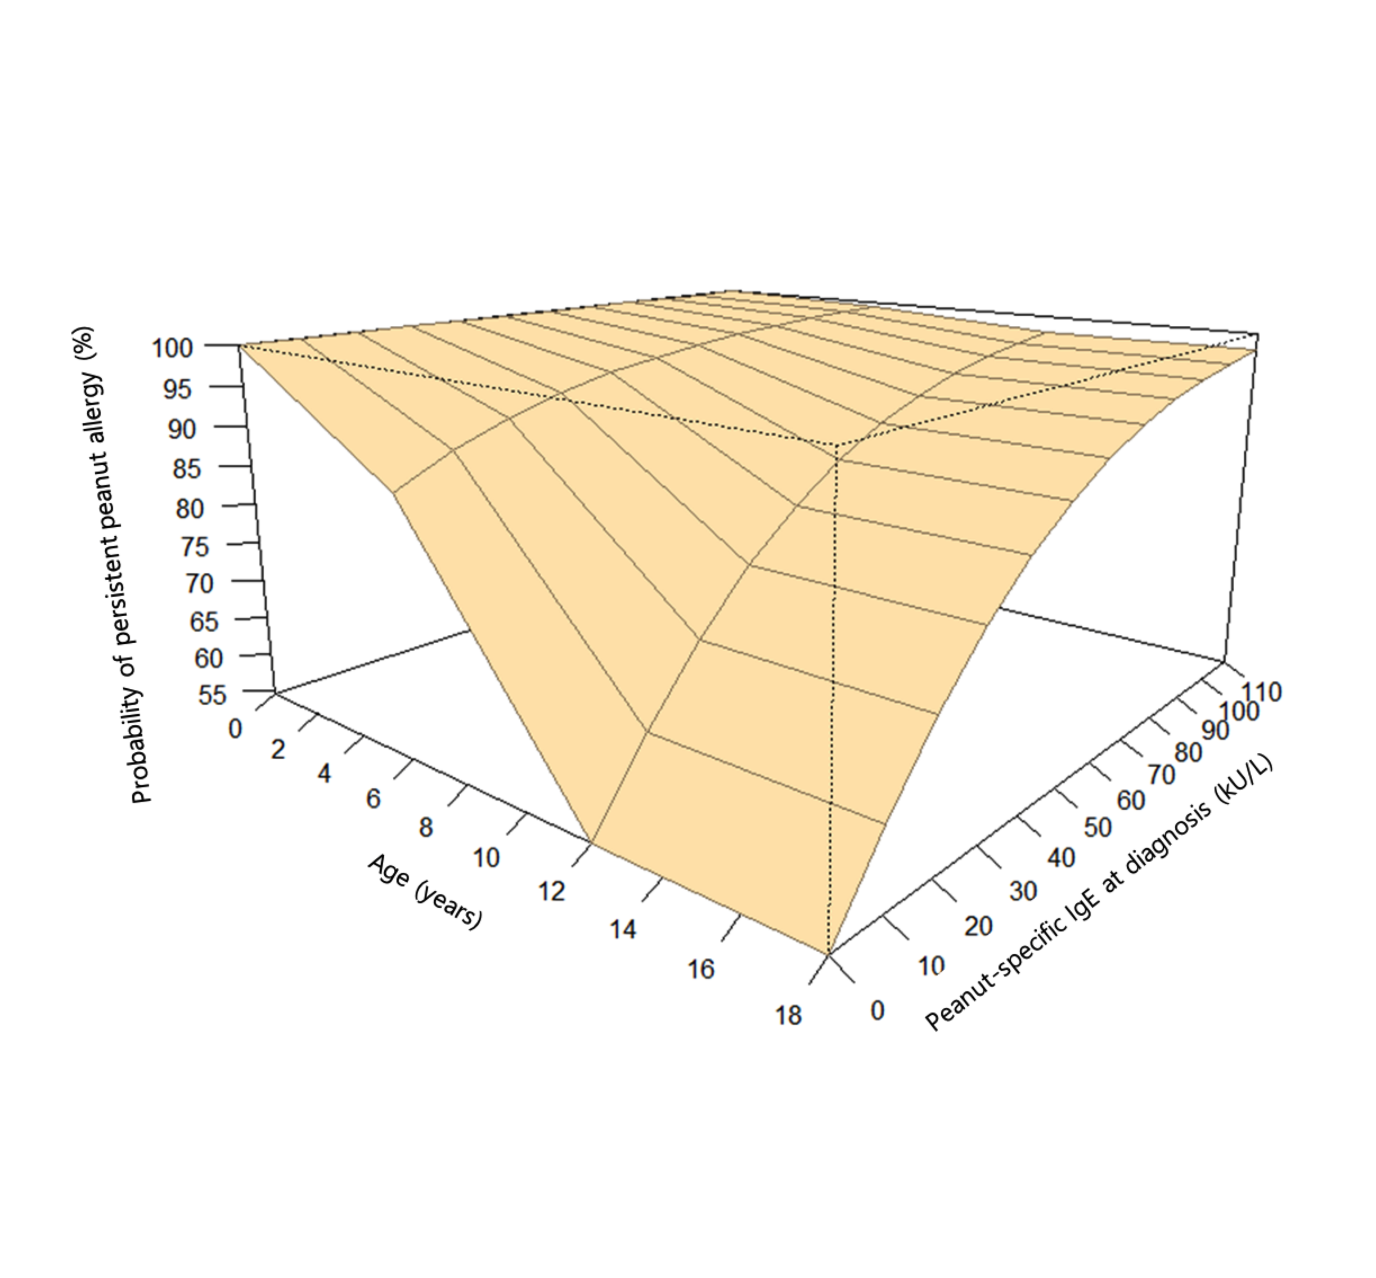


Fig. E1. The relationships among age, peanut-specific IgE (sIgE) levels at diagnosis, and the probability of peanut allergy persistence in a 3-dimensional plot. For example, the probability of resolution of peanut allergy after 6 years of age was 10% in children with peanut-sIgE levels of 11 kU/L at diagnosis.
